# Supplementary material for: Barrier Protection and Recovery Effects of Gut Commensal Bacteria on Differentiated Intestinal Epithelial Cells In Vitro
Source: PubMed Central journal article supplement (PMC7468801; doi:10.3390/nu12082251), 2020-07-28
Supplement: nutrients-12-02251-s001.pdf [file nutrients-12-02251-s001.pdf]

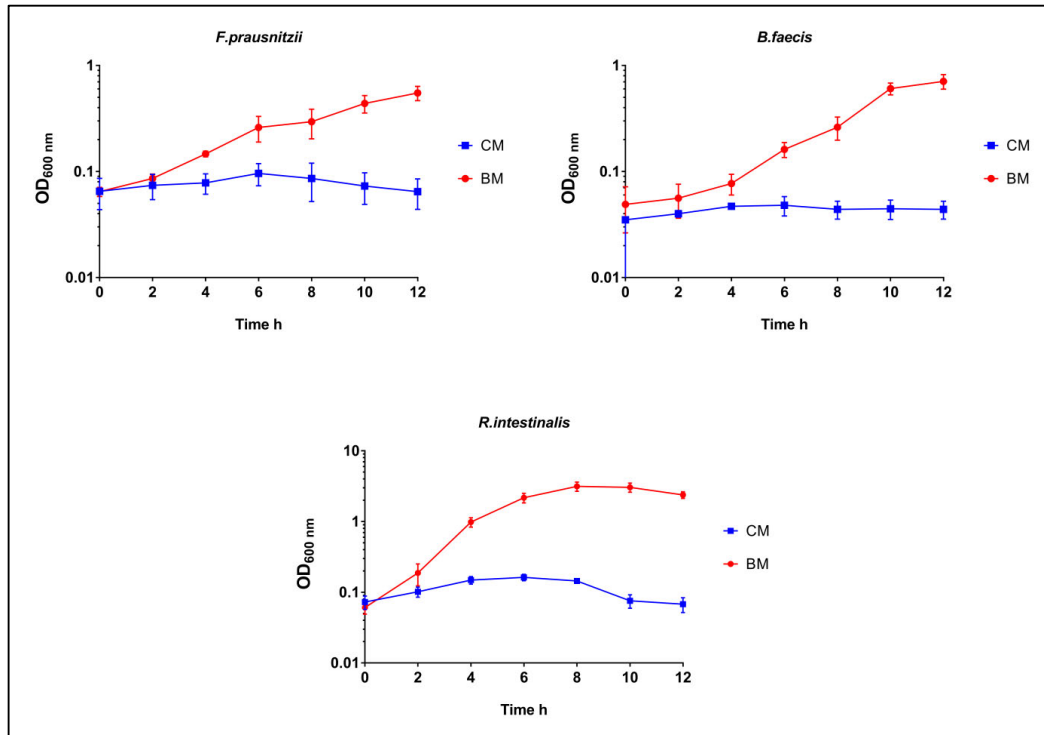

**Figure 1. Viability of the three commensal bacteria species in bacteria culture medium and cell culture medium.** *F. prausnitzii*, *B. faecis* and *R. intestinalis* in stationary phase suspended in anaerobic DMEM (CM) and supplemented YBHI (BM) and incubated anaerobically at 37°C for 12 hours. The optical density (OD<sub>600nm</sub>) was measured every 2 hours over the period of 12 hours. Results are represented as the mean of triplicate experiments  $\pm$ SD.
